# Supplementary material
Source: PubMed Central journal article supplement (PMC2573310)
Supplement: supp_28_22_6877__1.pdf [file supp_28_22_6877__1.pdf]

## 1 SUPPLEMENTAL MATERIAL

2

## 3 MATERIALS AND METHODS

4 **Yeast strains.** The *gcd11::KanMX* strain J212 (*MAT $\alpha$  leu2-3,-112 ura3-52 his3,*  
5 *gcd11 $\Delta$ ::KanMX* p[*GCD11, URA3*]) (6) was derived from the heterozygous  
6 *gcd11 $\Delta$ ::KanMX* diploid strain generated by the yeast genome deletion project and  
7 obtained from Research Genetics, Inc. (#20157). The diploid strain was transformed  
8 with the *URA3* plasmid pC2894 encoding *GCD11*, and then subjected to random spore  
9 analysis selecting for a Ura<sup>+</sup>, Kan<sup>r</sup> colony. Strain J212-1 was generated using plasmid  
10 shuffling to replace the [*GCD11, URA3*] plasmid in J212 with the [*GCD11, LEU2*]  
11 plasmid pC2887. To delete the *GCN2* gene in J212-1, the *loxP-URA3-loxP* cassette in  
12 the plasmid pUG72 was amplified by PCR using 5' and 3' primers with 45 bp  
13 complementarity to the sequences immediately preceding and following the *GCN2* ORF,  
14 respectively. The PCR product was introduced into strain J212-1 selecting for Ura<sup>+</sup>  
15 transformants. A segregant (J212-2) in which homologous recombination between the  
16 *loxP* sites eliminated the *URA3* marker (2) was obtained by selecting for growth on  
17 medium containing 5-fluoroorotic acid. Finally, the yeast strain J292 (*MAT $\alpha$  leu2-3,-112*  
18 *ura3-52 his3, gcn2 $\Delta$ ::loxP, gcd11 $\Delta$ ::KanMX* p[*GCD11, URA3*]) was generated by  
19 reintroducing the [*GCD11, URA3*] plasmid pC2895 and then screening for a Ura<sup>+</sup>, Leu<sup>-</sup>  
20 segregant following growth on rich medium. Deletion of the *GCN2* gene in the *pep4 $\Delta$*   
21 strain obtained from the yeast genome deletion collection was performed as described  
22 above generating the strain J293 (*MAT $\alpha$  leu2 $\Delta$ , ura3 $\Delta$ , met15 $\Delta$ , his3, pep4 $\Delta$ ::KanMX,*  
23 *gcn2 $\Delta$ ::loxP*).

1 **Intragenic suppressor screening.** The *GCD11* gene was amplified by PCR using the  
2 primers GCD11 PstI (5'-CTAGCTGCAGCAGATCCAACCGCGGGAAGTGGC-3') and  
3 GCD11 EcoRI (5'-ACGCGAATTCGTCTCCATGTACAAACCACCG-3'), and then  
4 inserted between the PstI and EcoRI sites of the vector pAlter Ex2 (Promega) creating the  
5 plasmid pC2857. Derivatives of p2857 containing the N135D or the N135A mutation  
6 were generated using the pAlter Ex2 mutagenesis kit and the oligos N135D (5'-  
7 AAATTTTAGCATTTCGCGTAACCTAACTTAATAGTAATGTCACGTTCTAATTC-  
8 3') or N135A (5'-  
9 AAATTTTAGCATTTCGCGTAACCTAACTTAATAGTAATGGCACGTTCTAATTC-  
10 3'), respectively. The *GCD11-N135D* and *GCD11-N135A* mutant alleles were  
11 transferred to the single copy-number *LEU2* vector YCplac111 creating the plasmids  
12 pC2858 and pC2859, respectively. The *GCD11-N135D* allele was also transferred to the  
13 single copy-number *URA3* vector YCplac33 creating pC2893. Plasmid pC2858 was  
14 subjected to random mutagenesis by passage through *E coli* mutator strain XL1-Red  
15 (Stratagene, Inc.). In initial screens the *GCD11-N135D* allele was readily converted to  
16 wild type when introduced into a strain carrying a wild type *GCD11* plasmid. To avoid  
17 this problem of gene conversion, the mutant library was introduced into a derivative of  
18 yeast strain J212 in which the wild type [*GCD11*, *URA3*] plasmid was replaced with the  
19 [*GCD11-N135D*, *URA3*] plasmid pC2893. Transformants were isolated, replica printed  
20 to 5-FOA medium to select for loss of the unmutated [*GCD11-N135D*, *URA3*] plasmid,  
21 and then colonies growing faster than the parent strain expressing *GCD11-N135D* were  
22 selected for further analysis. The *GCD11-N135D* plasmid was isolated from the faster  
23 growing colonies and re-tested in yeast to confirm that the suppressor phenotype was



1 [(*A219T\_NC* 5'-  
 2 GAGGTTGTGGACAAGATTCATTACCTGTAATCAACAGTAACGCAGCATC -3')  
 3 and (*A219T\_code*  
 4 5'- GATGCTGCGTTACTGTTGATTACAGGTAATGAATCTTGTCCACAACCTC -  
 5 3')]; A382V [(*A382V\_NC* 5'-  
 6 GCAAACCTTCAAGTCATTTTGTTCGACAAATAAGGAGACAATGTTAG-3') and  
 7 (*A382V\_code*  
 8 5'- CTAACATTGTCTCCTTATTTGTCGAACAAAATGACTTGAAGTTTGC -3')].

9 The PCR products were inserted between the BamHI and Sall sites of the plasmids  
 10 pC2860 and pC2861 to generate the low and high copy-number *GCD11-T115A* (pC2868  
 11 and pC2869), *GCD11-A208V* (pC2862 and pC2863), *GCD11-A219T* (pC2866 and  
 12 pC2867), and *GCD11-A382V* (pC2864 and pC2865) plasmids, respectively

13 The *GCD11-NI35D* and *GCD11-NI35A* alleles in the low copy-number *LEU2*  
 14 plasmids pC2858 and pC2859, respectively, were amplified by PCR using the oligos  
 15 BamHI/*GCD11* and Sall/*GCD11* and then subcloned between the BamHI and Sall sites  
 16 of the plasmid pC2860 generating the *His<sub>8</sub>-GCD11-NI35D* and *His<sub>8</sub>-GCD11-NI35A*  
 17 plasmids pC2874 and pC2875, respectively. The same PCR product carrying the  
 18 *GCD11-NI35D* sequences was subcloned to the plasmid pC2861 to generate the high  
 19 copy-number *His<sub>8</sub>-GCD11-NI35D* plasmid pC2870.

20 To generate low and high copy-number *His<sub>8</sub>*-tagged versions of the *GCD11*  
 21 suppressor mutants, the suppressor alleles were amplified by PCR and cloned between  
 22 the BamHI and Sall sites of the vectors pC2860 and pC2861, respectively. Plasmid  
 23 pC2889 (*GCD11-NI35D,A208V*) was used to create plasmids pC2876 (low copy, lc) and

1 pC2877 (high copy, hc); plasmid pC2890 (*GCD11-N135D,A219T*) was used to create  
 2 plasmids pC2878 (lc) and pC2879 (hc); and plasmid pC2892 (*GCD11-N135D,A382V*)  
 3 was used to create plasmids pC2880 (lc) and pC2881 (hc).

4 The *GCD11-N135A,382V* mutant was generated by fusion PCR using the  
 5 *GCD11-N135A* plasmid pC2875 as a template and the oligos BamHI/GCD11 +  
 6 *A382V\_NC* (5'-  
 7 GCAAACCTTCAAGTCATTTTGTTCGACAAATAAGGAGACAATGTTAG-3') and  
 8 Sall/GCD11 + *A382V\_code*  
 9 (5'- CTAACATTGTCTCCTTATTTGTTCGAACAAAATGACTTGAAGTTTGC -3').  
 10 The PCR product was cloned between the BamHI and Sall sites of the vector pC2860  
 11 creating pC2884. The *GCD11-N135D-A382V-A219T* plasmid (pC3152) was generated  
 12 by fusion PCR using pC2880 as a template and primers A219T\_cod and A219T\_NC  
 13 (listed above) and cloned between the BamHI and Sal I sites of the plasmid pC2860.

14 The high copy number [*SUI2, SUI3, IMT4*] plasmid pC2887 was constructed in  
 15 three steps. First, a Sall-BamHI *SUI3* fragment from the plasmid p920 was subcloned to  
 16 pRS423 creating the plasmid pC2885. Next, the *IMT4* gene was amplified by PCR using  
 17 the primers IMT4-SpeI (5'-TAACTAGTCGGAAGGTAAACTAACACGTAGG-3') and  
 18 IMT4-SacII (5'-TCACCGCGGA ACTATCAAGGGTCAGTCAATCAC-3'), and then  
 19 subcloned between SpeI and SacII sites of pC2885 generating the plasmid pC2886.  
 20 Finally, a BamHI fragment carrying the *SUI2* gene from the plasmid was inserted at the  
 21 BamHI site of pC2886 to create pC2887. The chromosomal *SUII* gene was amplified by  
 22 PCR using the primers SacI-SUI1  
 23 (5'-AAACCGAGCTCGGTACCGCACATACTCCCGAATC-3') and Xho-SUI1

1 (5'-CTGGATTCTCGAGAAGCTTGGGATTCCATGATTTC-3') and then inserted  
2 between the SacI and XhoI sites of the high copy-number *HIS3* vector pRS423 to  
3 generate the plasmid pC2888.

4

5 ***Co-immunoprecipitation assay of eIF2 and ternary complex.*** Co-immunoprecipitation  
6 assays of eIF2 and Met-tRNA<sub>i</sub><sup>Met</sup> were performed as described previously (7) with  
7 modifications as described below. 100-ml cultures of yeast strains expressing WT eIF2 $\gamma$ ,  
8 eIF2 $\gamma$ -N135D or eIF2 $\gamma$ -N135D,A208V were grown to OD<sub>600</sub> = 0.9-1.0. Cells were  
9 harvested and suspended in 5 ml of buffer A [20 mM Tris-HCl (pH 7.5), 100 mM KCl, 5  
10 mM MgCl<sub>2</sub>, 0.1 mM EDTA, 7 mM  $\beta$ -mercaptoethanol, 5 mM NaF, 1 mM  
11 phenylmethylsulfonyl fluoride (PMSF), complete protease inhibitors (Roche), 1  $\mu$ g/ $\mu$ l  
12 pepstain A and aprotinin]. Following addition of 0.5 ml glass beads, cells were broken  
13 by rapid mixing using a vortex mixer (10x by 30s) at 4 °C. One-third of the whole-cell  
14 extracts (WCEs) were set-aside as input samples and the remaining two-thirds of each  
15 WCE was mixed with 0.4 ml Ni<sup>2+</sup>-agarose beads for 2 hr at 4 °C. Following washing, the  
16 beads were either mixed with SDS-sample buffer or suspended in 300  $\mu$ l of 1x first-  
17 strand synthesis buffer (Life Technologies). Samples for Western analysis of eIF2  
18 integrity were subjected to SDS-PAGE followed by immunoblotting with polyclonal  
19 antiserum against yeast eIF2 $\alpha$ , eIF2 $\beta$ , and eIF2 $\gamma$ . For analysis of Met-tRNA<sub>i</sub><sup>Met</sup>, RNA in  
20 the input and pull-down samples was extracted using citric acid-saturated  
21 phenol/chloroform/isoamyl alcohol (25:24:1). The extracted RNA was ethanol-  
22 precipitated, washed, dried briefly and suspended in 100  $\mu$ l water.

1 Reverse transcription (RT)-PCR analysis of tRNA<sub>i</sub><sup>Met</sup> was performed as described  
2 previously (4) with modifications as described below.) For RT reactions (total volume 40  
3  $\mu$ l), 0.1- or 1.0- $\mu$ l of RNA was incubated for 1 h at 42 °C with 200 ng random hexamers  
4 (Promega), 400 U of Superscript II reverse transcriptase and 1X First Strand Buffer (Life  
5 Technologies) 0.25 mM dithiothreitol, and 0.5 mM each nucleoside triphosphate. PCR  
6 reactions contained 80 pmol primers (5' primer: 5'-CAGGGCTCATAACCCTGAT-3'  
7 and 3' primer: 5'-TGGTAGCGCCGCTCGGTTTC-3' to give 50-bp product), either 0.2  
8 or 1  $\mu$ l RT products, and 0.5X PureTaq PCR Beads (GE Healthcare) in a total volume of  
9 14  $\mu$ l. PCR was performed under the following conditions: (1) 95 °C for 2 min, (2) 30  
10 cycles of 95 °C for 1 min, 55 °C for 30s, 72 °C for 1 min, and (3) 72 °C for 3 min.  
11 Reaction products were resolved by electrophoresis on a 20% TBE-acrylamide gel  
12 (Invitrogen), and stained with ethidium bromide. Gels were scanned and quantified using  
13 ImageJ software (NIH).

14

15 ***In vivo 43S complex formation.*** Formaldehyde cross-linking and fractionation of extracts  
16 by sedimentation through sucrose density gradients were performed as described  
17 previously (5). WT or eIF2 $\gamma$ -N135D mutant strains were cultured in 300 ml minimal  
18 medium plus appropriate supplements to OD<sub>600</sub>~1.5. The cultures were cross-linked with  
19 2% HCHO in an ice-cold bottle and incubated on ice for 1 h with occasional gentle  
20 shaking. The cross-linking reaction was stopped by the addition of 100 mM glycine and  
21 the harvested cells were stored at -70 °C. The cross-linked cells were broken with glass  
22 beads and equal amounts of WCEs ( $A_{260} = 28$ ) were separated by sedimentation through  
23 7.5-30% sucrose gradients using an SW41 rotor (Beckmen) at 41000 rpm for 4.45 h. The

1 gradients were fractionated into 700  $\mu$ l fractions, and 35  $\mu$ l aliquots were mixed with 6X  
2 loading dye [300 mM Tris-HCl pH 6.8, 12% (w/v) SDS, 0.6% (w/v) bromophenol blue,  
3 60% (v/v) glycerol and 600 mM  $\beta$ -mercaptoethanol] and separated on 4-12% NuPAGE  
4 gels (Invitrogen). Immunoblot analysis was performed using polyclonal antiserum against  
5 yeast eIF2 $\alpha$ , eIF2 $\gamma$ , eIF1, eIF3a and the 40S ribosomal subunit protein S4.

6

## 7 SUPPLEMENTARY FIGURES

8

### 9 **Figure S1. Analysis of eIF2 integrity and ternary complexes in whole cell extracts.**

10 **(A)** Co-precipitation of eIF2 $\alpha$  and eIF2 $\beta$  with eIF2 $\gamma$  from crude cell extracts. WCEs  
11 were prepared from strains expressing the indicated WT or mutant forms of His-tagged  
12 eIF2 $\gamma$  and mixed with Ni<sup>2+</sup>-agarose beads. Pellet fractions were analyzed by SDS-PAGE  
13 and immunoblot analysis using anti-eIF2 $\gamma$  (top), anti-eIF2 $\beta$  (middle), and anti-eIF2 $\alpha$   
14 (bottom) antiserum. **(B)** Co-precipitation of tRNA<sub>i</sub><sup>Met</sup> with eIF2 from crude cell extracts.  
15 tRNA<sub>i</sub><sup>Met</sup> in pellet fractions described in panel A was detected by RT-PCR analysis as  
16 described in Materials and Methods. Inputs represent 3% of the starting material and the  
17 two lanes represent 0.1 and 1.0X of each sample. Presented at the top of the co-  
18 immunoprecipitation (Co-IP) lanes is the amount of tRNA<sub>i</sub><sup>Met</sup> co-immunoprecipitated  
19 with the eIF2 $\gamma$  mutants – values were normalized to the amount recovered with WT  
20 eIF2 $\gamma$ .

21

### 22 **Figure S2. Analysis of growth of yeast strains overexpressing eIF2 $\gamma$ mutants.**

23 Derivatives of yeast strain J292 expressing the indicated WT or mutant forms of eIF2 $\gamma$



1 from low (left panel) or high (right panel) copy-number plasmids were serially diluted,  
2 spotted on SD medium, and incubated 3 days at 30 °C as described in Figure 1B.

3

4 **Figure S3. Determination of equilibrium dissociation constants for GDP binding to**  
5 **eIF2 complexes containing WT or mutant forms of eIF2 $\gamma$ .** 40 nM purified WT or  
6 indicated eIF2 mutant complexes were incubated with 0-400 nM [<sup>3</sup>H]GDP in 30  $\mu$ l  
7 reaction volume at 26 °C for 10 min. Nitrocellulose filter binding assays were performed  
8 as described previously (3), and the data were plotted using Sigma Plot 9.0 software.  
9 Each point represents the mean of at least three independent experiments, and error bars  
10 were removed to simplify viewing of the results. The dissociation constants ( $K_d$ ) in nM  
11 are summarized in Table 1.

12

13 **Figure S4. Determination of equilibrium dissociation constants for GTP binding to**  
14 **eIF2 complexes containing WT or mutant forms of eIF2 $\gamma$ .** 40 nM purified WT or  
15 indicated eIF2 mutant complexes were incubated with 0-10  $\mu$ M [<sup>3</sup>H]GTP in 30  $\mu$ l  
16 reaction volume at 26 °C for 10 min. Nitrocellulose filter binding assays were performed  
17 as described previously (3), and the data was plotted using Sigma Plot 9.0 software. Each  
18 point represents the mean of at least three independent experiments, and error bars were  
19 removed to simplify viewing of the results. The dissociation constants ( $K_d$ ) in  $\mu$ M are  
20 summarized in Table 1.

21

22 **Figure S5. Determination of the equilibrium dissociation constants for Met-**  
23 **tRNA<sub>i</sub><sup>Met</sup> binding to eIF2 complexes containing WT or mutant forms of eIF2 $\gamma$ .** 1 nM

1 [<sup>3</sup>H]Met-tRNA<sub>i</sub><sup>Met</sup> was incubated with 0-300 nM purified WT or indicated eIF2 mutant  
2 complexes in 30 μl reaction volume at 26 °C for 10 min. Nitrocellulose filter binding  
3 assays were performed as described previously (3), and the data was plotted using Sigma  
4 Plot 9.0 software. Each point represents the mean of at least three independent  
5 experiments, and error bars were removed to simplify viewing of the results. The  
6 dissociation constants (K<sub>d</sub>) in nM are summarized in Table 1.

7

8 **Figure S6. Rate of GTP hydrolysis by eIF2 complexes containing WT or mutant**  
9 **forms of eIF2γ.** The experiment was performed as described in Alone et al (1).  
10 Preformed eIF2•GTP•Met-tRNA<sub>i</sub><sup>Met</sup> ternary complexes containing 40 pmoles [γ-<sup>33</sup>P]GTP  
11 were mixed with preformed 40S complexes (40S subunits plus eIF1, eIF1A, eIF5 and  
12 model mRNA), and the fraction GTP hydrolyzed at each time point was monitored by  
13 thin layer chromatography as previously described (1). The data were plotted using  
14 Sigma Plot 9.0 software, and each data point represents the mean of at least three  
15 independent experiments. The error bars were removed to simplify viewing of the results.  
16 The rate of GTP hydrolysis and the V<sub>max</sub> for the reactions are summarized in Table 1.

17

18 **Figure S7. Analysis of eIF1 binding to 40S complexes in HCHO-treated cells. (A)**  
19 WT or eIF2γ-N135D mutant strains were grown in minimal medium and cross-linked  
20 with 2% HCHO (final concentration) for 1 hr at 4 °C. WCEs were separated on 7.5-30%  
21 sucrose gradients, and gradient fractions were subjected to Western analysis using  
22 antiserum directed against the indicated proteins. The first lane contains 8% of the input  
23 from the WCE. Fractions containing 40S subunits are boxed. **(B)** Initiation factor binding

1 to 40S subunits in three replicates of the experiment in (A) were quantified relative to the  
2 40S protein S4. Results are means +/- s.e. (n = 3).

3

#### 4 REFERENCES

5

- 6 1. **Alone, P. V., and T. E. Dever.** 2006. Direct binding of translation initiation  
7 factor eIF2 $\gamma$ -G domain to its GTPase-activating and GDP-GTP exchange factors  
8 eIF5 and eIF2B $\epsilon$ . *J Biol Chem* **281**:12636-44.
- 9 2. **Gueldener, U., J. Heinisch, G. J. Koehler, D. Voss, and J. H. Hegemann.**  
10 2002. A second set of loxP marker cassettes for Cre-mediated multiple gene  
11 knockouts in budding yeast. *Nucleic Acids Res* **30**:e23.
- 12 3. **Kapp, L. D., and J. R. Lorsch.** 2004. GTP-dependent recognition of the  
13 methionine moiety on initiator tRNA by translation factor eIF2. *J Mol Biol*  
14 **335**:923-36.
- 15 4. **Larminie, C. G., J. E. Sutcliffe, K. Tosh, A. G. Winter, Z. A. Felton-Edkins,**  
16 **and R. J. White.** 1999. Activation of RNA polymerase III transcription in cells  
17 transformed by simian virus 40. *Mol Cell Biol* **19**:4927-4934.
- 18 5. **Nielsen, K., B. Szamecz, L. Valasek, A. Jivotovskaya, B. S. Shin, and A. G.**  
19 **Hinnebusch.** 2004. Functions of eIF3 downstream of 48S assembly impact AUG  
20 recognition and *GCN4* translational control. *EMBO J* **23**:1166-1177.
- 21 6. **Roll-Mecak, A., P. Alone, C. Cao, T. E. Dever, and S. K. Burley.** 2004. X-ray  
22 structure of translation initiation factor eIF2 $\gamma$ : implications for tRNA and eIF2 $\alpha$   
23 binding. *J Biol Chem* **279**:10634-42.

- 1 7. **Singh, C. R., T. Udagawa, B. Lee, S. Wassink, H. He, Y. Yamamoto, J. T.**  
2 **Anderson, G. D. Pavitt, and K. Asano.** 2007. Change in nutritional status  
3 modulates the abundance of critical pre-initiation intermediate complexes during  
4 translation initiation in vivo. *J Mol Biol* **370**:315-330.  
5  
6

**A**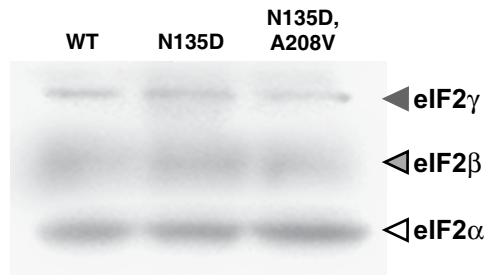**B**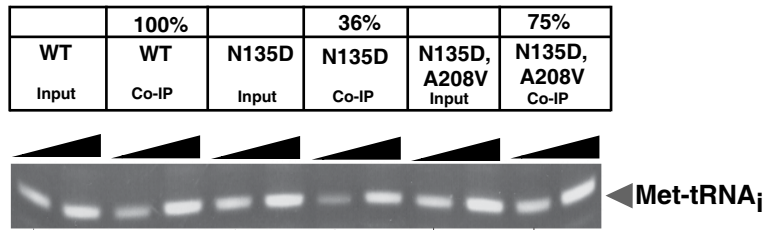

S1

S2

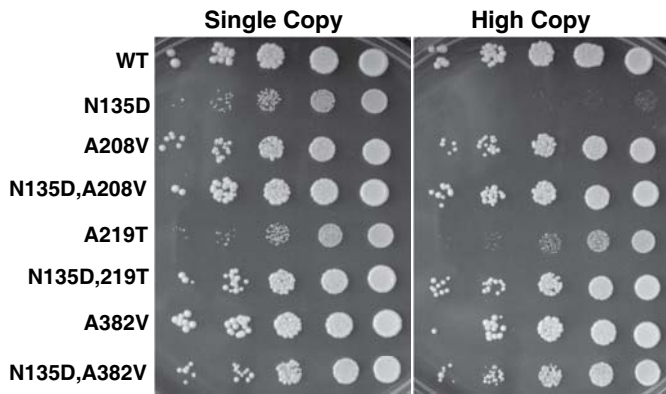

S3

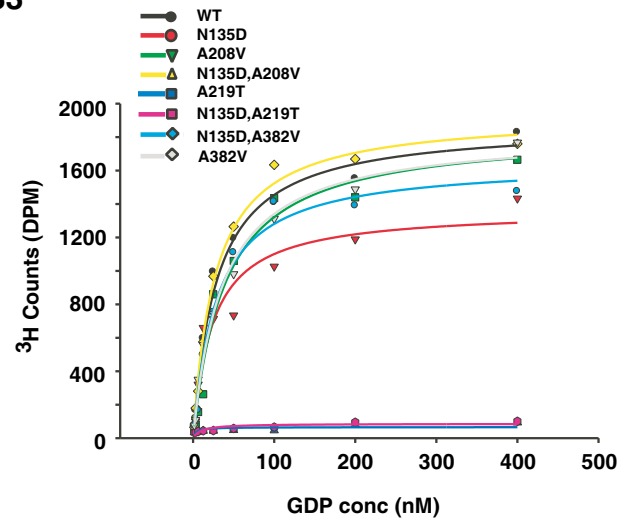

S4

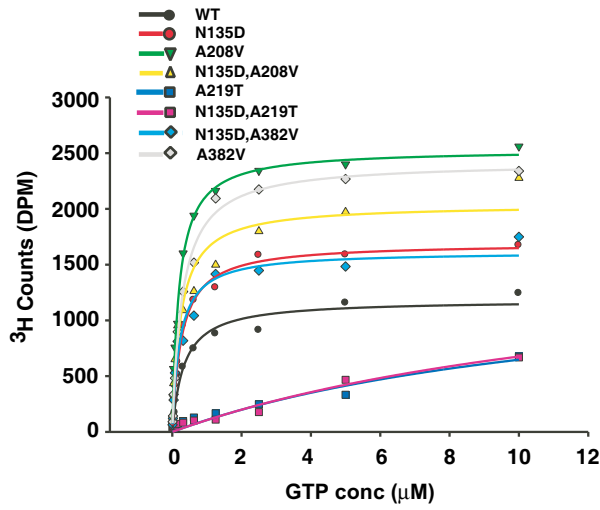

S5

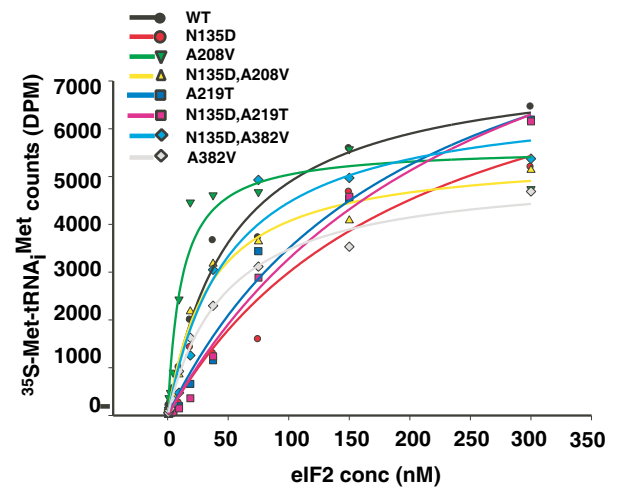

S6

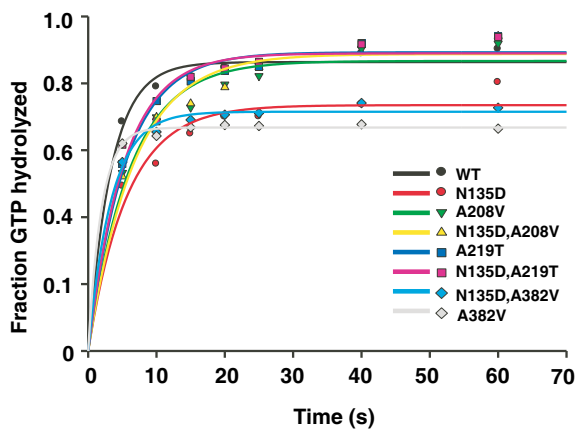

**A**

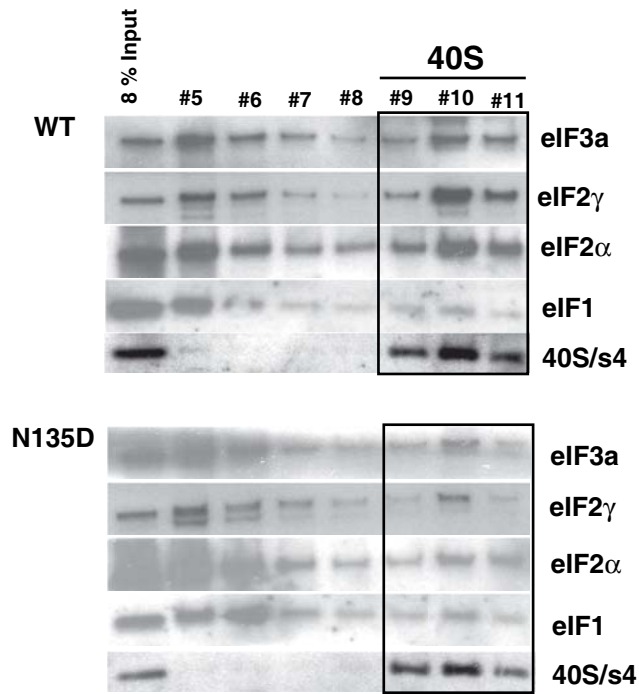

**B**

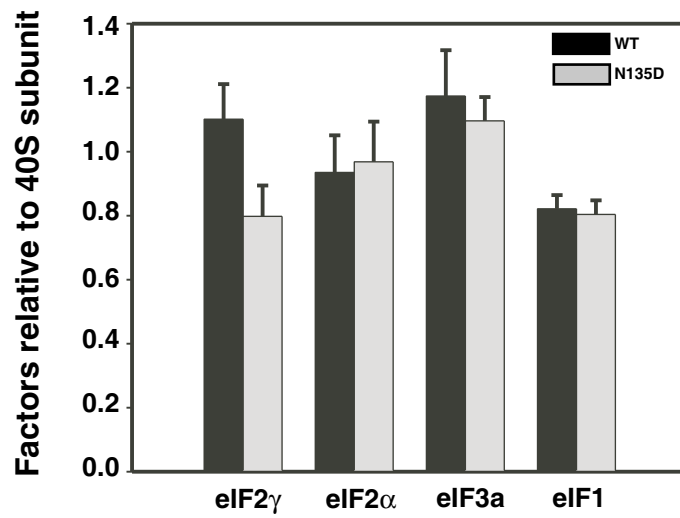

**S7**
